# Supplementary material
Source: PubMed Central journal article supplement (PMC6336523)
Supplement: NIHMS1511846-supplement-Online_Supplement.pdf [file NIHMS1511846-supplement-Online_Supplement.pdf]

## ONLINE SUPPLEMENTAL MATERIAL

### Atrial-specific gene delivery using an adeno-associated viral vector

Li Ni MD, PhD, Larry Scott Jr., BS, Hannah Campbell BS, Xiaolu Pan MD, Katherina M. Alsina, B.A, Julia Reynolds BS, Leonne Philippen PhD, Mohit Hulsurkar PhD, William R. Lagor PhD, Na Li, PhD, Xander H.T. Wehrens, MD, PhD

## DETAILED METHODS

**Plasmid production.** The AAV plasmid ubiquitously expressing GFP driven by the chicken beta actin promoter was obtained from the University of Pennsylvania vector core (pENN.AAV.CB7.Cl.eGFP.WPRE.rBG; PL-C-PV1963). The sequences and location of functional elements for the TNT<sup>1</sup> and ANF (*Nppa*)<sup>2</sup> promoters have been described previously. The new AAV vectors reported in this study were constructed using standard molecular biology approaches with gBlocks synthesized by IDT (Integrated DNA Technologies, Coralville, IA). Expression cassettes were cloned into plasmid 1179\_pAAV-U6-BbsI-gRNA-CB-EmGFP (Addgene #89060)<sup>3</sup>, which contains the Inverted Terminal Repeats (ITRs) from AAV2, and an Ampicillin resistance gene. Plasmid AAV9-TNT4-GFP (011LP-pAAV-TNT4-EmGFP-pA) expresses green fluorescent protein driven by the cardiomyocyte-specific TNT promoter. Plasmid AAV9-ANF-GFP (013LP-pAAV-ANF-657-EmGFP-pA) expresses the same transgene driven by the atrial-specific ANF promoter. Plasmid AAV9-ANF-CRE (014LP-pAAV-ANF-657-Cre-pA) expresses Cre recombinase driven by the ANF promoter. AAV vectors based on serotype 9 were packaged in HEK293T cells by the triple transfection method<sup>4</sup>, and purified by CsCl gradient ultracentrifugation<sup>5</sup>. The complete vector sequences listed at the end of this document. These plasmids will be made publicly available through Addgene upon publication of the manuscript.

**Production of adeno-associated virus type 9 (AAV9).** The AAV9 packaging vector pAAV2/9 (PL-T-P0008-R2) and the adenoviral helper plasmid pAdDeltaF6 (PL-F-PVADF6) were obtained from the University of Pennsylvania Vector Core and generated by Puresyn, Inc. HEK293T cells (ATCC, Manassas, VA) were used for AAV9 packaging using the triple transfection method of Xiao *et al.*<sup>4</sup> Cells were seeded in 150 mm plates (30-50% confluent) and fed with DMEM media (Lonza, Allendale, NJ) containing 10% fetal bovine serum (Thermo Fisher, Waltham, MA), L-glutamine, and penicillin/streptomycin (Thermo Fisher, Waltham, MA) 2 hours before transfection.

After 48-72 hours, cells were harvested using TrypLE™ express enzyme medium (Thermo Fisher, Waltham, MA) and collected in PBS (Corning, New York, NY). Cells were subjected to 3 freeze-thaw cycles (-80°C for 10 minutes, 37°C for 20 minutes) in resuspension buffer (50 mM Tris-HCl pH 8.0, 150 mM NaCl, 2 mM MgCl<sub>2</sub>). To digest cellular genomic DNA, cells were incubated with 3,000 U Benzonase (Sigma-Aldrich, St. Louis, MO) at 37°C for 1 hour. 1/39th volume of 1M CaCl<sub>2</sub> solution and 2/3 volume of 20% PEG 8000/1.25N NaCl were used to remove the cell debris and precipitate AAV. After 2 rounds of CsCl<sub>2</sub> gradient in 45,000 rpm and 60,000 rpm, AAV was collected from the relevant fractions: refractive index = 1.3680-1.3750 for the first gradient and refractive index = 1.3680-1.3750 for the second gradient.<sup>4</sup>

Dialysis was conducted for AAV9 against PBS with pre-wet 10,000 MWCO Slide-A-Lyzer Cassettes (0.5–3.0 mL), and concentrated using Amicon 100 kDa MWCO centrifugal filtration device (UFC910008, EMD Millipore). AAV9 was stored at -80°C. For titer quantification, purified virus was digested with DNase I (Sigma-Aldrich, St. Louis, MO) to remove

unencapsidated DNA from the prep, followed by proteinase K digestion to free the DNA template from the AAV capsid. AAV titers were determined by qPCR relative to standard curves generated from the respective serially diluted plasmids.<sup>4</sup>

**Immunohistochemistry.** To prepare tissues for immunohistochemical analysis, standard embedding and sectioning procedures were utilized as described.<sup>6</sup> Mouse hearts and select organs (e.g. liver, lung, muscle, brain and kidney) were flushed or rinsed with saline (Thermo Fisher, Waltham, MA) to remove excess blood, and fixed in 4% paraformaldehyde (PFA) (Electron Microscopy Science, Hatfield, PA) at 4°C for 1-2 hours. Tissues were then placed in 3mM glycine (Sigma-Aldrich, St. Louis, MO) at 4°C overnight to neutralize PFA. The following day, the glycine solution was discarded and the tissues were placed in 30% sucrose solution for 24-48 hours at 4°C to preserve tissue morphology. The fixed tissues were then embedded in optical cutting temperature (OCT) compound (Sakura Finetek, Torrance, CA) and stored at -80°C. A Leica cryostat was used for tissue block sectioning, at a cutting temperature from -23 to -27°C and a thickness of 10µm. Sample slides were stored immediately at -80°C until immunohistochemical analysis.

Immunohistochemical examinations for GFP were performed on 80°C frozen materials. Briefly, heart sections were air dried for 10 min, then rinsed in PBS. Next, 10% goat serum in PBS followed by overnight incubation at 4°C the sections were incubated with overnight at 4°C with a mouse GFP monoclonal antibody (1:500, MA5-15256, Thermo Fischer, Waltham, MA). After three washes in PBS, sections were incubated with mouse IgG (H+L) cross-adsorbed secondary antibody (A-11004, Thermo Fischer, Waltham, MA) antibody at a dilution of 1:500 in 10% goat serum-PBS for 30 min at room temperature. We employed the secondary antibody alone as controls to ensure antibody specificity. All incubations with fluorescent antibodies were performed in the dark. After washing, the sections were fixed in a drop of mounting solution (Vector Laboratories, Inc, Berlingame, CA), analyzed using a confocal microscopy LSM 880 (Zeiss, Oberkochen, Germany). No nonspecific staining was observed with the secondary antibody alone.

**Mouse TAC model.** Animals subjected to TAC/Sham ranged in age from 2.8 to 4.8 months at the time of surgery. Mice were anesthetized with 2% isoflurane mixed with 100% O<sub>2</sub> (0.8 L/min) and anesthesia was maintained at 1.5–2% isoflurane by endotracheal intubation and ventilation throughout the procedure. An anterior thoracotomy was performed to expose the aortic arch to the level of the third intercostal space. Constriction was performed by tying a 6-0 silk suture against a 28-gauge needle between the first and second trunk of the aortic arch. For consistency, constriction levels were quantified by measuring alterations in Doppler velocities of the right and left carotid arteries 7 days post-surgery. Right-to-left carotid peak velocity ratios ranged from 5.0 to 6.5 and 6-week post TAC ejection fractions ranged from 40%–55% in TAC groups used for experiments. The initial animal number subjected to surgery was 32 mice (22 males, 10 females). Seven mice found dead in the first 7 days after TAC surgery, before Doppler was performed. We excluded 3 animals from total of 25, because they exhibited only modest decrements in cardiac function (EF>55% by 6 weeks post TAC).

**Transthoracic echocardiography.** Mice were anesthetized using 1.5% isoflurane in 100% O<sub>2</sub> at 1.5 L/min. Vital signs were continuously monitored to ensure similar heart and respiration rates. Body temperature was maintained between 36.5–37.5°C on a heated platform. Cardiac function was assessed using a VisualSonics VeVo 770 Imaging System (VisualSonics, Toronto, Canada) equipped with high-frequency 30 MHz probe, as described.<sup>7, 8</sup>

**Western blotting.** Atrial and ventricular lysate was made after flash freezing tissue in liquid nitrogen followed by homogenization in RIPA-CHAPS lysis buffer and sonication 3x for 1 second. Protein lysates were denatured for 10 minutes at 70°C in Laemmli buffer with beta-mercaptoethanol prior to electrophoresis on a 10% acrylamide gel. Proteins were transferred overnight at 4°C to a PVDF membrane. Membranes were blocked 30 minutes at RT in 5% Bovine Serum Albumin/ 5% non-fat milk-tris-buffered saline (TBS) followed by overnight incubation at 4°C with primary antibodies for GFP (1:5000, MA5-15256, Thermo Fischer, Waltham, MA), JPH2 (1:1000, a custom rabbit polyclonal Yenzym antibody raised against a synthetic peptide consisting of the amino acid sequence 458-CRPRESPQLHERETPQPEG-475), and GAPDH (1:10000, MAB374, EMD Millipore, Burlington, MA), membranes were incubated in goat anti-mouse IgG (H+L) superclonal™ secondary antibody, Alexa Fluor 680 (1:10000, A28183, Thermo Fischer, Waltham, MA) or goat anti-rabbit IgG (H&L) antibody DyLight™ 800 conjugated (1:10000, 611-145-002, Rockland, Limerick, PA) prior to imaging with Li-Cor Odyssey Blot Imager.

**Atrial myocyte Ca<sup>2+</sup> imaging.** Atrial myocytes were isolated using a collagenase method as described.<sup>9</sup> Atrial myocytes were loaded with 2 mmol/L Fluo-4-AM (Invitrogen, Carlsbad, CA) in normal Tyrode solution containing 1.8 mmol/L Ca<sup>2+</sup> for 30 minutes at room temperature. Cells were subsequently imaged by confocal microscopy. Line scans were used to obtain Ca spark data and transient amplitudes. Caffeine was used to determine the SR load. Data were analyzed using Image J and the Spark Master plug-in.

Online Figure I

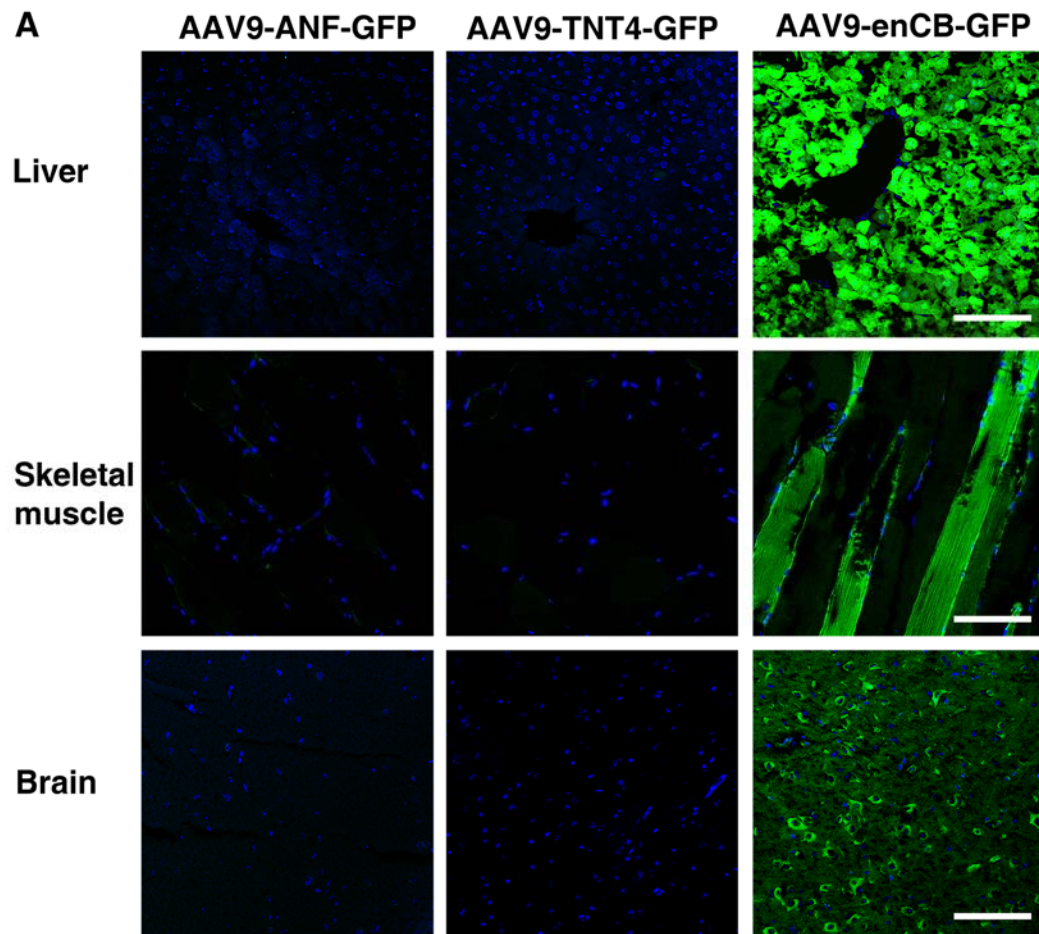

**Atrial-specific expression of GFP after systemic injection of AAV9-ANF-GFP in C57Bl/6J mice.** Sections from C57Bl/6J mice injected retro-orbitally with AAV9-ANF-GFP ( $1 \times 10^{12}$  GC) exhibited no extracardiac GFP expression in representative tissues (liver, skeletal muscle, brain). Scale bars, 100  $\mu$ m.

Online Figure II

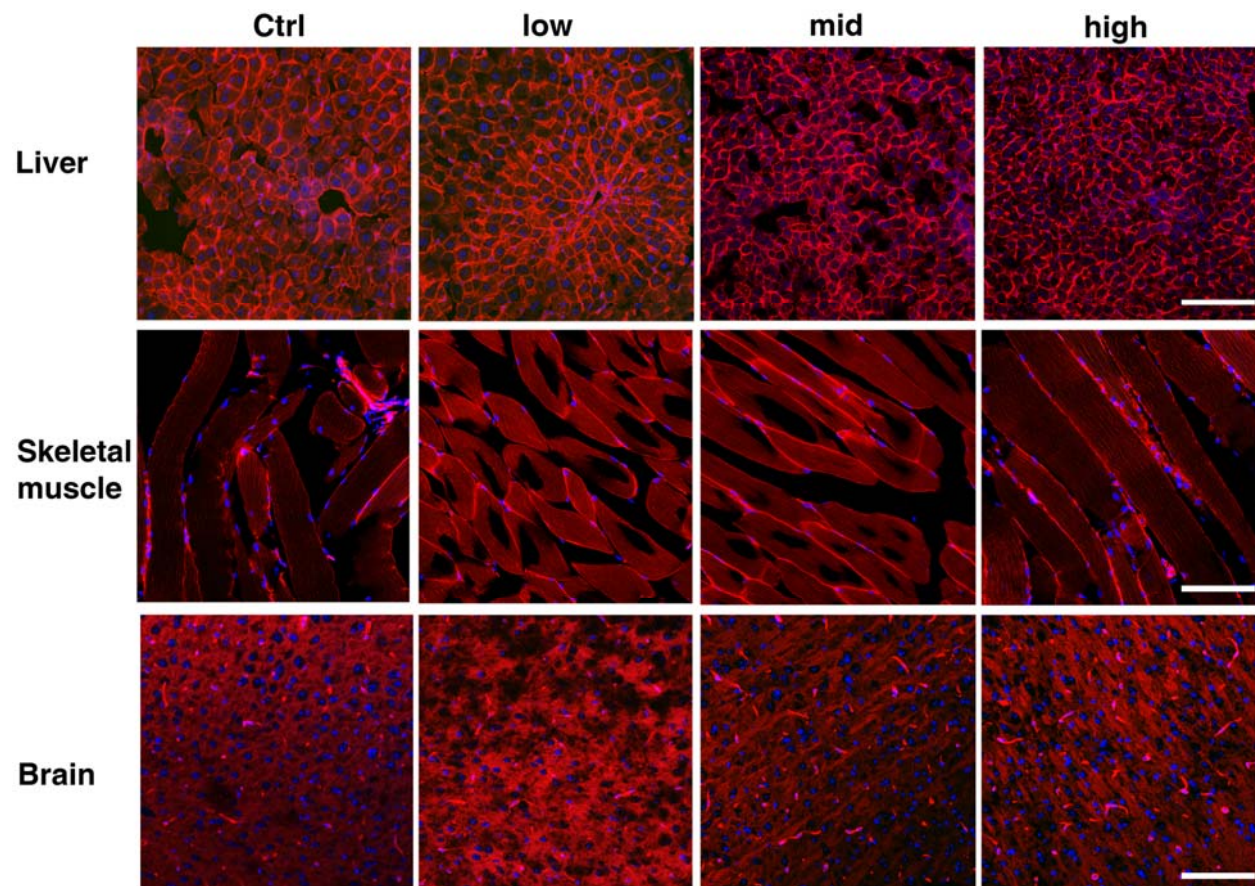

**Absence of extracardiac Cre-mediated recombination in *mTmG* mice injected with AAV9-ANF-GFP.** Sections from *mT/mG* mice injected retro-orbitally with AAV9-ANF-GFP ( $5 \times 10^{11}$  GC low dose;  $1 \times 10^{12}$  GC mid dose;  $5 \times 10^{12}$  GC high dose) exhibited no or minimal extracardiac Cre-mediated recombination in representative tissues (liver, skeletal muscle, brain). Scale bars, 100  $\mu\text{m}$ ). Ctrl, control (saline, no virus).

Online Figure III

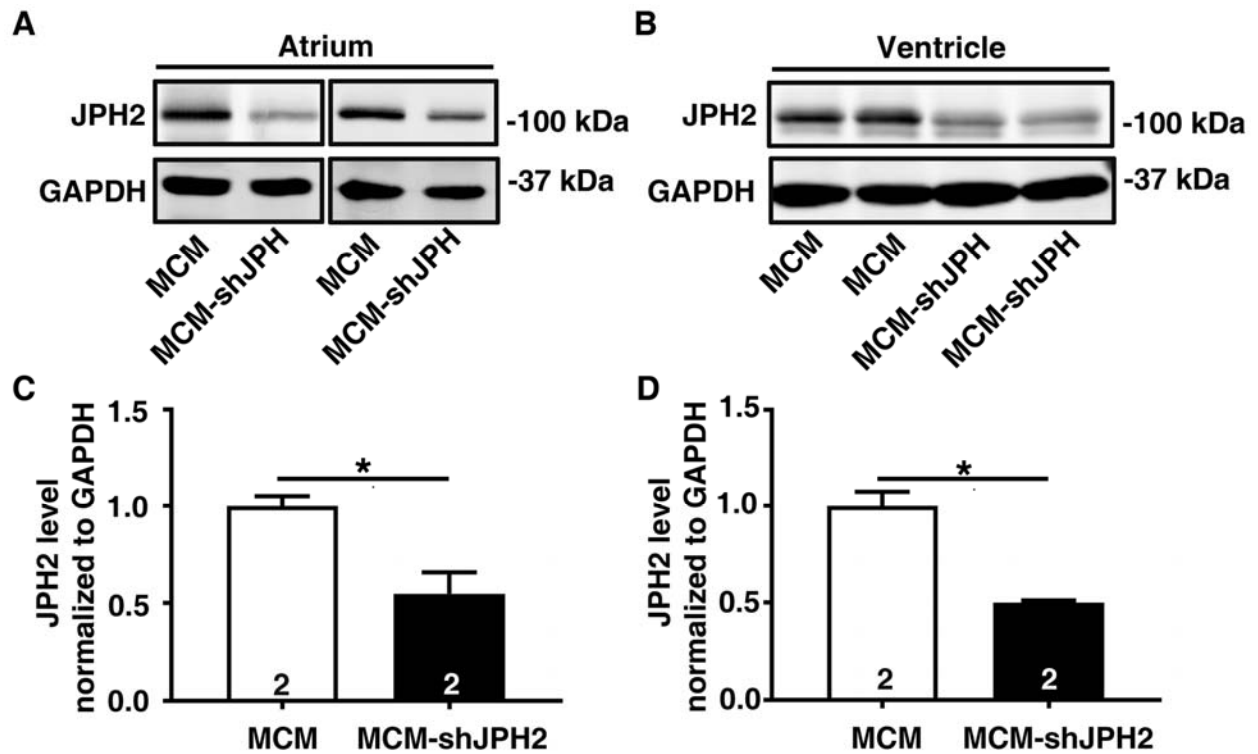

**Reduced JPH2 protein levels in atria and ventricles of MCM-shJPH2 mice injected with tamoxifen.** Western blots showing reduced JPH2 protein levels normalized to GAPDH loading controls in both atrial and ventricular tissue of shJPH2 mice injected with AAV9-TNT-Cre.  $*p < 0.05$ .

## Online Table I

### Echocardiographic parameters of mTmG mice

|             | Sham+saline<br>(n=5) | TAC+saline<br>(n=6) | Sham+AAV9<br>(n=5) | TAC+AAV9<br>(n=6) |
|-------------|----------------------|---------------------|--------------------|-------------------|
| HR (bpm)    | 432.8±17.4           | 500.4±9.8**         | 448.1±20.6         | 514.8±8.4#        |
| EF (%)      | 75.6±3.8             | 48.0±2.2***         | 73.5±1.9           | 46.5±2.0###       |
| FS (%)      | 44.1±3.2             | 24.0±1.3***         | 41.8±1.7           | 23.0±1.1###       |
| LVAW;d (mm) | 0.92±0.04            | 1.04±0.02*          | 0.90±0.03          | 1.12±0.04##       |
| LVID;d (mm) | 3.62±0.03            | 4.25±0.22*          | 3.49±0.06          | 4.08±0.22#        |
| LVPW;d (mm) | 0.95±0.06            | 1.34±0.04***        | 1.01±0.09          | 1.34±0.08#        |
| LVAW;s (mm) | 1.17±0.07            | 1.18±0.04           | 1.12±0.03          | 1.27±0.04#        |
| LVID;s (mm) | 2.17±0.14            | 3.27±0.19**         | 2.19±0.04          | 3.16±0.21##       |
| LVPW;s (mm) | 1.40±0.07            | 1.60±0.07           | 1.45±0.13          | 1.60±0.07         |

Data are expressed as mean ± SEM. \* P<0.05, \*\* P<0.01, \*\*\* P<0.01 vs Sham+saline, and #P<0.05, ## P<0.01, ### P<0.01 vs TAC+saline. HR, heart rate; EF, ejection fraction; FS, left ventricular fractional shortening; LVAW, left ventricular anterior wall thickness; LVID, Left ventricular internal diameter; LVPW, left ventricular posterior wall thickness. Subscript letters represent during diastole or systole.

## Online Table II

### Characteristics of Ca<sup>2+</sup> sparks in atrial myocytes.

|                              | shJPH2+saline | shJPH2+AAV9-AAV-Cre |
|------------------------------|---------------|---------------------|
| N (sparks)                   | 89            | 225                 |
| N (mice)                     | 3             | 3                   |
| Amplitude(F/F <sub>0</sub> ) | 0.84±0.02     | 0.83±0.01           |
| FWHM (μm)                    | 1.37±0.06     | 1.42±0.04           |
| FDHM (ms)                    | 24.7±1.14     | 23.8±0.73           |
| TtP (ms)                     | 18.8±1.48     | 17.8±0.83           |
| dV/dt (mV/ms)                | 77.1±1.39     | 74.9±1.07           |
| Tau (ms)                     | 27.4±2.14     | 24.2±1.38           |

FWHM, Full width at half maximum; FDHM, Full duration at half maximum; TtP, time to peak.



### Online Table III

#### Echocardiographic parameters of shJPH2 mice.

|             | shJPH2+saline<br>n=7 | shJPH2+AAV9-AAV-Cre<br>n=9 |
|-------------|----------------------|----------------------------|
| HR (bpm)    | 537.2±22.8           | 570.0±8.7                  |
| EF (%)      | 67.8±4.3             | 69.2±0.7                   |
| FS (%)      | 37.6±3.1             | 38.2±0.5                   |
| LVAW;d (mm) | 0.70±0.03            | 0.78±0.02                  |
| LVID;d (mm) | 3.53±0.15            | 3.54±0.06                  |
| LVPW;d (mm) | 0.73±0.02            | 0.77±0.03                  |
| LVAW;s (mm) | 1.13±0.06            | 1.23±0.04                  |
| LVID;s (mm) | 2.31±0.21            | 2.32±0.05                  |
| LVPW;s (mm) | 0.89±0.03            | 0.92±0.03                  |

Data are expressed as mean ± SEM. HR, heart rate; EF, ejection fraction; FS, left ventricular fractional shortening; LVAW, left ventricular anterior wall thickness; LVID, Left ventricular internal diameter; LVPW, left ventricular posterior wall thickness. Subscript letters represent during diastole or systole.

## Online References

1. Werfel S, Jungmann A, Lehmann L, Ksienzyk J, Bekeredjian R, Kaya Z, Leuchs B, Nordheim A, Backs J, Engelhardt S, Katus HA, Muller OJ. Rapid and highly efficient inducible cardiac gene knockout in adult mice using aav-mediated expression of cre recombinase. *Cardiovasc Res.* 2014;104:15-23.
2. Houweling AC, van Borren MM, Moorman AF, Christoffels VM. Expression and regulation of the atrial natriuretic factor encoding gene nppa during development and disease. *Cardiovasc Res.* 2005;67:583-593.
3. Jarrett KE, Lee CM, Yeh YH, Hsu RH, Gupta R, Zhang M, Rodriguez PJ, Lee CS, Gillard BK, Bissig KD, Pownall HJ, Martin JF, Bao G, Lagor WR. Somatic genome editing with crispr/cas9 generates and corrects a metabolic disease. *Sci Rep.* 2017;7:44624.
4. Xiao X, Li J, Samulski RJ. Production of high-titer recombinant adeno-associated virus vectors in the absence of helper adenovirus. *J Virol.* 1998;72:2224-2232.
5. Lagor WR, Johnston JC, Lock M, Vandenberghe LH, Rader DJ. Adeno-associated viruses as liver-directed gene delivery vehicles: Focus on lipoprotein metabolism. *Methods Mol Biol.* 2013;1027:273-307.
6. Burgdorf WH, Mukai K, Rosai J. Immunohistochemical identification of factor viii-related antigen in endothelial cells of cutaneous lesions of alleged vascular nature. *Am J Clin Pathol.* 1981;75:167-171.
7. Respress JL, Wehrens XH. Transthoracic echocardiography in mice. *J Vis Exp.* 2010:1738.
8. Respress JL, van Oort RJ, Li N, Rolim N, Dixit SS, deAlmeida A, Voigt N, Lawrence WS, Skapura DG, Skardal K, Wisloff U, Wieland T, Ai X, Pogwizd SM, Dobrev D, Wehrens XH. Role of ryr2 phosphorylation at s2814 during heart failure progression. *Circ Res.* 2012;110:1474-1483.
9. Li N, Wang T, Wang W, Cutler MJ, Wang Q, Voigt N, Rosenbaum DS, Dobrev D, Wehrens XH. Inhibition of camkii phosphorylation of ryr2 prevents induction of atrial fibrillation in fkbp12.6 knockout mice. *Circ Res.* 2012;110:465-470.

## VECTOR SEQUENCES

### AAV9-TNT4-GFP

#### Features:

|                                           |            |
|-------------------------------------------|------------|
| 5'ITR                                     | 1..170     |
| hTNNT2 -502 to +42 Promoter Werfels et al | 180..723   |
| attB1                                     | 791..815   |
| ATG Start                                 | 824..826   |
| 3X FLAG                                   | 827..892   |
| HA tag                                    | 896..922   |
| GGAGG flexible linker                     | 929..943   |
| EmGFP                                     | 944..1663  |
| SV40 polyA                                | 1678..1899 |
| 3'ITR                                     | 1919..2088 |
| pEMBL8 Plasmid Backbone                   | 2113..4528 |

#### Sequence:

CAGCTGCGCGCTCGCTCGCTCACTGAGGCCGCCCGGGCAAAGCCCGGGCGTCGGGCGA  
CCTTTGGTCGCCCGGCCTCAGTGAGCGAGCGAGCGCGCAGAGAGGGAGTGGCCAACTCC  
ATCACTAGGGGTTCTTGTAGTTAATGATTAACCCGCCATGCTACTTATCTACATCCTTAAG  
CTCAGTCCATTAGGAGCCAGTAGCCTGGAAGATGTCTTTACCCCCAGCATCAGTTCAAGTG  
GAGCAGCACATAACTCTTGCCCTCTGCCTTCCAAGATTCTGGTGCTGAGACTTATGGAGTG  
TCTTGGAGGTTGCCTTCTGCCCCCAACCCTGCTCCCAGCTGGCCCTCCCAGGCCTGGGT  
TGCTGGCCTCTGCTTTATCAGGATTCTCAAGAGGGACAGCTGTTTTATGTTGCATGACTGT  
TCCCTGCATATCTGCTCTGGTTTTAAATAGCTTATCTGAGCAGCTGGAGGACCACATGGGC  
TTATATGGCGTGGGGTACATGTTCTGTAGCCTTGTCCCTGGCACCTGCCAAAATAGCAGC  
CAACACCCCCACCCCCACCGCCATCCCCCTGCCCCACCCGTCCCCTGTCGCACATTCT  
CCCTCCGCAGGGCTGGCTCACCAGGCCCCAGCCCACATGCCTGCTTAAAGCCCTCTCCAT  
CCTCTGCCTCACCCAGTCCCCGCTGAGACTGAGCAGACGCCTCCAGGATCTGTCGGCAG  
GAATTCCAGACCCTCTAGAAAATATCCAAGGATCTGGATCCTCCCAAGCTGGCTAGTTAAG  
CTATCAACAAGTTTGTACAAAAAAGCAGGCTTTAAAACCATGGACTACAAAGACCATGACG  
GTGATTATAAAGATCATGACATCGATTACAAGGATGACGATGACAAGCTTTACCCATACGAT  
GTTCCAGATTACGCTACGCGTGGAGGCGCTGGCGGAATGGTGAGCAAGGGCGAGGAGCT  
GTTACCCGGGGTGGTGCCCATCCTGGTTCGAGCTGGACGGCGACGTAAACGGCCACAAGT  
TCAGCGTGTCCGGCGAGGGCGAGGGCGATGCCACCTACGGCAAGCTGACCCTGAAGTTC  
ATCTGCACCACCGGCAAGCTGCCCGTGCCCTGGCCACCCCTCGTGACCACCTTCACCTAC  
GGCGTGCAGTGCTTCGCCCGCTACCCCGACCACATGAAGCAGCACGACTTCTTCAAGTCC  
GCCATGCCCGAAGGCTACGTCCAGGAGCGCACCATCTTCTTCAAGGACGACGGCAACTAC  
AAGACCCGCGCCGAGGTGAAGTTCGAGGGGCGACACCCTGGTGAACCGCATCGAGCTGAA  
GGGCATCGACTTCAAGGAGGACGGCAACATCCTGGGGCACAAGCTGGAGTACAACACTACAA  
CAGCCACAAGGTCTATATCACCGCCGACAAGCAGAAGAACGGCATCAAGGTGAACTTCAA  
GACCCGCCACAACATCGAGGACGGCAGCGTGCAGCTCGCCGACCACTACCAGCAGAACA  
CCCCCATCGGCGACGGCCCCGTGCTGCTGCCCGACAACCACTACCTGAGCACCCAGTCC  
GCCCTGAGCAAAGACCCCAACGAGAAGCGCGATCACATGGTCCTGCTGGAGTTCGTGACC  
GCCGCCGGGATCACTCTCGGCATGGACGAGCTGTACAAGTAAGCGGCCGCTTCGAGCAG  
ACATGATAAGATACATTGATGAGTTTGGACAAACCACAACCTAGAATGCAGTGAATAAATGC  
TTTATTTGTGAAATTTGTGATGCTATTGCTTTATTTGTAACCATTATAAGCTGCAATAAACA  
GTTAACAACAACAATTGCATTCATTTTATGTTTCAGGTTTCAGGGGGAGATGTGGGAGGTTTT  
TTAAAGCAAGTAAACCTCTACAAATGTGGTAAAATCGAGAGCATGGCTACGTAGATAAGTA  
GCATGGCGGGTTAATCATTAACTACAAGGAACCCCTAGTGATGGAGTTGGCCACTCCCTCT

CTGCGCGCTCGCTCGCTCACTGAGGCCGGGCGACCAAAGGTCGCCCGACGCCCGGGCTT  
TGCCCGGGCGGCCTCAGTGAGCGAGCGAGCGCGCAGCTGCATTAATGAATCGGCCAACG  
CGCGGGGAGAGGGCGGTTTGCCTATTGGGCGCTCTTCCGCTTCCTCGCTCACTGACTCGCT  
GCGCTCGGTCGTTCCGGCTGCGGCGAGCGGTATCAGCTCACTCAAAGGCGGTAATACGGTT  
ATCCACAGAATCAGGGGATAACGCAGGAAAGAACATGTGAGCAAACCGCAGCAAAGGC  
CAGGAACCGTAAAAAGGCCGCGTTGCTGGCGTTTTTCCATAGGCTCCGCCCCCTGACGA  
GCATCACAAAAATCGACGCTCAAGTCAGAGGTGGCGAAACCCGACAGGACTATAAAGATA  
CCAGGCGTTTTCCCCCTGGAAGCTCCCTCGTGCGCTCTCCTGTTCCGACCCTGCCGCTTAC  
CGGATACCTGTCCGCCTTTCTCCCTTCGGGAAGCGTGGCGCTTTTCTCATAGCTCACGCTGT  
AGGTATCTCAGTTCGGTGTAGGTCGTTCCGCTCCAAGCTGGGCTGTGTGCACGAACCCCC  
GTTCCAGCCCGACCGCTGCGCCTTATCCGGTAACTATCGTCTTGAGTCCAACCCGGTAAGA  
CACGACTTATCGCCACTGGCAGCAGCCACTGGTAACAGGATTAGCAGAGCGAGGTATGTA  
GGCGGTGCTACAGAGTTCTTGAAGTGGTGGCCTAACTACGGCTACACTAGAAGGACAGTA  
TTTGGTATCTGCGCTCTGCTGAAGCCAGTTACCTTCGGAAAAAGAGTTGGTAGCTCTTGAT  
CCGGCAAACAACCACCGCTGGTAGCGGTGGTTTTTTTTGTTTGCAAGCAGCAGATTACGC  
GCAGAAAAAAGGATCTCAAGAAGATCCTTTGATCTTTTTCTACGGGGTCTGACGCTCAGTG  
GAACGAAAACCTCACGTTAAGGGATTTTGGTCATGAGATTATCAAAAAGGATCTTCACCTAGA  
TCCTTTTTAAATTAATAAATGAAGTTTTAAATCAATCTAAAGTATATATGAGTAACTTGGTCTG  
ACAGTTACCAATGCTTAATCAGTGAGGCACCTATCTCAGCGATCTGTCTATTTTCGTTCCATCC  
ATAGTTGCCTGACTCCCGTCGTGTAGATAACTACGATACGGGAGGGCTTACCATCTGGC  
CCCAGTGCTGCAATGATACCGCGAGACCCACGCTCACCGGCTCCAGATTTATCAGCAATA  
AACCAGCCAGCCGGAAGGGCCGAGCGCAGAAGTGGTCCTGCAACTTTATCCGCCTCCATC  
CAGTCTATTAATTGTTGCCGGGAAGCTAGAGTAAGTAGTTCGCCAGTTAATAGTTTGCGCA  
ACGTTGTTACCATTACTACAGGCATCGTGGTGTACGCTCGTCGTTTGGTATGGCTTCATT  
CAGCTCCGGTTCCCAACGATCAAGGCGAGTTACATGATCCCCATGTTGTGCAAAAAAGC  
GGTTAGCTCCTTCGGTCCTCCGATCGTTGTGAGAAGTAAGTTGGCCGCAGTGTTATCACTC  
ATGTTTATGGCAGCACTGCATAATTCTTTACTGTGATGCCATCCGTAAGATGCTTTTTCTGT  
GACTGGTGTGACTCAACCAAGTCATTCTGAGAATAGTGTATGCGGCGACCGAGTTGCTCT  
TGCCCGGCGTCAATACGGGATAATACCGCGCCACATAGCAGAACTTTAAAAGTGCTCATCA  
TTGGAAAACGTTCTTCGGGGCGAAAACCTCAAGGATCTTACCACTATTGAGATCCAGTTC  
GATGTAACCCACTCGTGCACCCAACTGATCTTCAGCATCTTTTACTTTTACCAGCGTTTCTG  
GGTGAGCAAAAACAGGAAGGCAAAATGCCGCAAAAAGGGAATAAGGGGCGACACGGAAAT  
GTTGAATACTCATACTCTTCCTTTTTCAATATTATTGAAGCATTTATCAGGGTTATTGTCTCA  
TGAGCGGATACATATTTGAATGTATTTAGAAAAATAAACAAATAGGGGTTCCGCGCACATTT  
CCCCGAAAGATGCCACCTGAAATTATAAACGTTAATATTTTGTAAATTCGCGTTAAATTTT  
TGTTAAATCAGCTCATTTTTTTAACCAATAGGCCGAAATCGGAAAAATCCCTTATAAATCAAAA  
GAATAGACCGAGATAGGGTTGAGTGTGTTCCAGTTTGAACAAGAGTCCACTATTGAGGA  
ACGTGAACTCCAGCGTCAAAGGGCGAAAACCGTCTATCGGGGCGATGGCCCACTACGTG  
AACCATCACCTAATCAAGTTTTTTGGGGTTCGAGGTGCCGTAAGCACTAAATCGGAACCC  
TAAAGGGAGCCCCGATTTAGAGCTTGACGGGGAAAGCCGGCGAACGTGGCGAGAAAGG  
AAGGGAAGAAAGCGAAAGGAGCGGGCGCTAGGGCGCTGGCAAGTGTAGCGGTACGCTG  
CGCGTAACCACCACACCCGCCGCGCTTAATGCGCCGCTACAGGGCGCGTCCCATTCGCC  
ATTCAGGCTGCGCAACTGTTGGGAAGGGCGATCGGTGCGGGCCTCTTCGCTATTACGC

## AAV9-ANF-GFP

### Features:

|                         |            |
|-------------------------|------------|
| 5'ITR                   | 1..170     |
| ANF promoter            | 180..836   |
| attB1                   | 904..928   |
| ATG Start               | 937..939   |
| 3X FLAG sequence        | 940..1005  |
| HA tag                  | 1009..1035 |
| GGAGG flexible linker   | 1042..1056 |
| EmGFP                   | 1057..1776 |
| SV40 polyA              | 1791..2012 |
| 3'ITR                   | 2032..2201 |
| pEMBL8 Plasmid Backbone | 2226..4641 |

### Sequence:

CAGCTGCGCGCTCGCTCGCTCACTGAGGCCGCCCGGGCAAAGCCCCGGGCGTCCGGGCGA  
CCTTTGGTCGCCCCGGCCTCAGTGAGCGAGCGAGCGCGCAGAGAGGGAGTGGCCAACCTCC  
ATCACTAGGGGTTCTTGTAGTTAATGATTAACCCGCCATGCTACTTATCTACATCCTTAAG  
GGGCCCTGTATCATGTTGGCTTCCTGGCTGACTTCATACTCTAAAAAAAAAATAATAGCTCT  
TTCACCTGACTGCTAACAGGGACATCTAGGGTGGGGGTGGGCTGTCTGGGGCCAGAGGT  
CCACCCACGAGGCCGATGAATCAGGTGTGAAGCTAGCTCCAGCATGTGTACTCCCTGGCC  
AGCCTAGCTGGCCTCCCAGCTGCCTGTCATTGCCTCCTCTCCCGCCCTTATTTGGAGCCC  
CTGACAGCTGAGCAGCAAGCAGGGGGAGCTGGGTGCAGGCCAGCCGTCACCCTCTGCTT  
CCCTGCATGGGTCTGTTGCCAGGGAGAAAGAATCCTGAGGCGAGCGCCAGGAAGATA  
ACCAAGGACTCTTTTCTGCTCCTCTCACACCTTTGAAGTGGGGCCTCTTGAGGCAAATCA  
GCAAGAATGTGACTCTTGCAGCTGAGGGTCTGGGGGAGGGGGGTGAGTGGAGCTGCTCA  
AGGCAAAGGGGCCGTGACAAGCTTTGCCGAAGTATAACTTTAAAAGGGCATCTTCTGCTG  
GCTCCTCACTCCATCGCTTTATCGCTGCAAGTGACAGAATGGGGAGGGTTCTAGCCCCC  
TGCCTTCTCAAAGAGCTGGGGGGCTATAAAAACGGGAGATGCTGGCAGCTAGGAGACGAA  
TTCCAGACCCTCTAGAAAATATCCAAGGATCTGGATCCTCCAAGCTGGCTAGTTAAGCTA  
TCAACAAGTTTGTACAAAAAGCAGGCTTTAAAACCATGGACTACAAAGACCATGACGGTG  
ATTATAAAGATCATGACATCGATTACAAGGATGACGATGACAAGCTTTACCCATACGATGTT  
CCAGATTACGCTACGCGTGGAGGCGCTGGCGGAATGGTGAAGCAAGGGCGAGGAGCTGTT  
CACCGGGGTGGTGGCCATCCTGGTCGAGCTGGACGGCGACGTAACGGCCACAAGTTCA  
GCGTGTCCGGCGAGGGCGAGGGCGATGCCACCTACGGCAAGCTGACCCTGAAGTTCATC  
TGCACCACGGCAAGCTGCCCGTGCCTGGCCACCCTCGTGACCACCTTACCTACGG  
CGTGCAGTGCTTCGCCCGCTACCCCGACCACATGAAGCAGCACGACTTCTTCAAGTCCGC  
CATGCCCGAAGGCTACGTCCAGGAGCGCACCATCTTCTTCAAGGACGACGGCAACTACAA  
GACCCGCGCCGAGGTGAAGTTCGAGGGCGACACCCTGGTGAACCGCATCGAGCTGAAGG  
GCATCGACTTCAAGGAGGACGGCAACATCCTGGGGCACAAGCTGGAGTACAACACTACAACA  
GCCACAAGGTCTATATCACCGCCGACAAGCAGAAGAACGGCATCAAGGTGAAGTTCAGA  
CCCGCCACAACATCGAGGACGGCAGCGTGCAGCTCGCCGACCACTACCAGCAGAACACC  
CCATCGGCGACGGCCCCGTGCTGCTGCCCGACAACCACTACCTGAGCACCCAGTCCGC  
CCTGAGCAAAGACCCCAACGAGAAGCGCGATCACATGGTCCTGCTGGAGTTCGTGACCGC  
CGCCGGGATCACTCTCGGCATGGACGAGCTGTACAAGTAAGCGGCCGCTTCGAGCAGAC  
ATGATAAGATACATTGATGAGTTTGGACAAACCACAACACTAGAATGCAGTGAATAAATGCTT  
TATTTGTGAAATTTGTGATGCTATTGCTTTATTTGTAACCATTATAAGCTGCAATAAACAAGT  
TAACAACAACAATTGCATTCATTTTATGTTTCAGGTTTCAGGGGGAGATGTGGGAGGTTTTTT  
AAAGCAAGTAAACCTCTACAAATGTGGTAAAATCGAGAGCATGGCTACGTAGATAAGTAG  
CATGGCGGGTTAATCATTAACACTACAAGGAACCCCTAGTGATGGAGTTGGCCACTCCCTCTC

TGCGCGCTCGCTCGCTCACTGAGGCCGGGCGACCAAAGGTCGCCCCGACGCCCGGGCTTT  
GCCCGGGCGGCCTCAGTGAGCGAGCGAGCGCGCAGCTGCATTAATGAATCGGCCAACGC  
GCGGGGAGAGGGCGGTTTGCGTATTGGGCGCTCTTCCGCTTCCTCGCTCACTGACTCGCTG  
CGCTCGGTCTTTCGGCTGCGGCGAGCGGTATCAGCTCACTCAAAGGCGGTAATACGGTTA  
TCCACAGAATCAGGGGATAACGCAGGAAAGAACATGTGAGCAAACCGCAGCAAAGGCC  
AGGAACCGTAAAAAGGCCGCGTGTGCTGGCGTTTTTCCATAGGCTCCGCCCCCTGACGAG  
CATCACAAAAATCGACGCTCAAGTCAGAGGTGGCGAAACCCGACAGGACTATAAAGATAC  
CAGGCGTTTTCCCCCTGGAAGCTCCCTCGTGCGCTCTCCTGTTCCGACCCTGCCGCTTACC  
GGATACCTGTCCGCCTTTCTCCCTTCGGGAAGCGTGGCGCTTTCTCATAGCTCAGCTGTA  
GGTATCTCAGTTCGGTGTAGGTCGTTTCGCTCCAAGCTGGGCTGTGTGCACGAACCCCCCG  
TTCAGCCCGACCGCTGCGCCTTATCCGGTAACTATCGTCTTGAGTCCAACCCGGTAAGACA  
CGACTTATCGCCACTGGCAGCAGCCACTGGTAACAGGATTAGCAGAGCGAGGTATGTAGG  
CGGTGCTACAGAGTTCTTGAAGTGGTGGCCTAACTACGGCTACACTAGAAGGACAGTATTT  
GGTATCTGCGCTCTGCTGAAGCCAGTTACCTTCGGAAAAAGAGTTGGTAGCTCTTGATCCG  
GCAAACAACCCACCGCTGGTAGCGGTGGTTTTTTTTGTTTGAAGCAGCAGATTACGCGCAG  
AAAAAAGGATCTCAAGAAGATCCTTTGATCTTTTCTACGGGGTCTGACGCTCAGTGGAAC  
GAAAACCTCACGTTAAGGGATTTTGGTTCATGAGATTATCAAAAAGGATCTTTCACCTAGATCCT  
TTTAAATTAATAATGAAGTTTTAAATCAATCTAAAGTATATATGAGTAACTTGGTCTGACAG  
TTACCAATGCTTAATCAGTGAGGCACCTATCTCAGCGATCTGTCTATTTTCGTTTCATCCATAG  
TTGCCTGACTCCCCGTCGTGTAGATAACTACGATACGGGAGGGCTTACCATCTGGCCCCA  
GTGCTGCAATGATACCGCGAGACCCACGCTCACCGGCTCCAGATTTATCAGCAATAAACCA  
GCCAGCCGGAAGGGCCGAGCGCAGAAGTGGTCTGCAACTTTATCCGCCTCCATCCAGTC  
TATTAATTGTTGCCGGGAAGCTAGAGTAAGTAGTTCGCCAGTTAATAGTTTGCGCAACGTT  
GTTACCATTACTACAGGCATCGTGGTGTACGCTCGTTCGTTTGGTATGGCTTCATTCAGCT  
CCGTTCCCAACGATCAAGGCGAGTTACATGATCCCCCATGTTGTGCAAAAAGCGGTTAG  
CTCCTTCGGTCTCCTCCGATCGTTGTCAGAAGTAAGTTGGCCGAGTGTTATCACTCATGTT  
ATGGCAGCACTGCATAATTCTCTTACTGTCATGCCATCCGTAAGATGCTTTTCTGTGACTGG  
TGAGTACTCAACCAAGTCATTCTGAGAATAGTGTATGCGGCGACCGAGTTGCTCTTGCCCG  
GCGTCAATACGGGATAATACCGCGCCACATAGCAGAACTTTAAAAGTGCTCATCATTGGAA  
AACGTTCTTCGGGGCGAAAACCTCTCAAGGATCTTACCACTATTGAGATCCAGTTTCGATGTA  
ACCCACTCGTGACCCCAACTGATCTTCAGCATCTTTTACTTTTACCAGCGTTTCTGGGTGA  
GCAAAAACAGGAAGGCAAAATGCCGCAAAAAGGGAATAAGGGCGACACGGAAATGTTGA  
ATACTCATACTCTTCCTTTTTCAATATTATTGAAGCATTATCAGGGTTATTGTCTCATGAGC  
GGATACATATTTGAATGTATTTAGAAAAATAAACAAATAGGGGTTCCGCGCACATTTCCCCG  
AAAGATGCCACCTGAAATTATAAACGTTAATATTTTTGTTAAAATTTCGCGTTAAATTTTTGTTA  
AATCAGCTCATTTTTTAACCAATAGGCCGAAATCGGAAAAATCCCTTATAAATCAAAAGAAT  
AGACCGAGATAGGGTTGAGTGTGTTCCAGTTTGAACAAGAGTCCACTATTGAGGAACGT  
GAACTCCAGCGTCAAAGGGCGAAAACCGTCTATCGGGGCGATGGCCCACTACGTGAACC  
ATCACCTAATCAAGTTTTTTGGGGTCGAGGTGCCGTAAAGCACTAAATCGGAACCCTAAA  
GGGAGCCCCCGATTTAGAGCTTGACGGGGAAAGCCGGCGAACGTGGCGAGAAAGGAAGG  
GAAGAAAGCGAAAGGAGCGGGCGCTAGGGCGCTGGCAAGTGTAGCGGTACGCTGCGC  
GTAACCACCACACCCGCCGCGCTTAATGCGCCGCTACAGGGCGCGTCCCATTCGCCATTC  
AGGCTGCGCAACTGTTGGGAAGGGCGATCGGTGCGGGCCTCTTCGCTATTACGC

## AAV9-ANF-CRE

### Features:

|                         |            |
|-------------------------|------------|
| 5'ITR                   | 1..170     |
| ANF promoter            | 180..836   |
| ATG START               | 890..892   |
| SV40 NLS                | 893..913   |
| CRE Recombinase         | 914..1939  |
| HA                      | 1940..1966 |
| SV40 polyA              | 1984..2205 |
| 3'ITR                   | 2225..2394 |
| pEMBL8 Plasmid Backbone | 2419..4834 |

### Sequence:

CAGCTGCGCGCTCGCTCGCTCACTGAGGCCGCCCGGGCAAAGCCCGGGCGTCGGGCGA  
CCTTTGGTCGCCCGCCTCAGTGAGCGAGCGAGCGCGCAGAGAGGGAGTGGCCAACCTCC  
ATCACTAGGGGTTCTTGTAGTTAATGATTAACCCGCCATGCTACTTATCTACATCCTTAAG  
GGGCCCTGTATCATGTTGGCTTCTGGCTGACTTCATACTCTAAAAAAAAAATAATAGCTCT  
TTCACCTGACTGCTAACAGGGACATCTAGGGTGGGGGTGGGCTGTCTGGGGCCAGAGGT  
CCACCCACGAGGCCGATGAATCAGGTGTGAAGCTAGCTCCAGCATGTGTACTCCCTGGCC  
AGCCTAGCTGGCCTCCCAGCTGCCTGTCATTGCCTCCTCTCCCGCCCTTATTTGGAGCCC  
CTGACAGCTGAGCAGCAAGCAGGGGGAGCTGGGTGCAGGCCAGCCGTCACCCTCTGCTT  
CCCTGCATGGGTCTGTTGCCAGGGAGAAAGAATCCTGAGGCGAGCGCCAGGAAGATA  
ACCAAGGACTCTTTTCTGCTCCTCTCACACCTTTGAAGTGGGGGCTCTTGAGGCAAATCA  
GCAAGAATGTGACTCTTGCAGCTGAGGGTCTGGGGGAGGGGGGTGAGTGGAGCTGCTCA  
AGGCAAAGGGGCGGTGACAAGCTTTGCCGAAGTATAACTTTAAAAGGGCATCTTCTGCTG  
GCTCCTCACTCCATCGCTTTATCGCTGCAAGTGACAGAATGGGGAGGGTTCTAGCCCCC  
TGCCTTCTCAAAGAGCTGGGGGGCTATAAAAACGGGAGATGCTGGCAGCTAGGAGACGAA  
TTCCAGACCCTCTAGAAAATATCCAAGGATCTGGATCCAAAGGTACCACCATGCCCAAGAA  
GAAGAGGAAGGTGTCCAATCTCCTGACTGTTCCACCAGAACCTCCCTGCGCTGCCAGTAGA  
TGCCACTAGCGATGAGGTCAGGAAAAATCTCATGGATATGTTTAGGGATAGACAGGCGTTT  
TCTGAACACACCTGGAAAATGCTGCTTAGCGTGTGCCGATCCTGGGCAGCCTGGTGTAA  
CTGAACAATCGCAAATGTTCCCCGCCGAGCCGGAGGACGTGCGCGATTACCTGCTGTAT  
CTCCAGGCAAGAGGGCTGGCTGTCAAGACTATCCAGCAGCACTTGGGCCAACTGAATATG  
CTGCATCGACGCAGCGGGCTCCCCGGCCTAGCGATTCAAACGCAGTCTCCCTTGTTATG  
AGGAGAATTAGAAAGGAAAACGTAGATGCGGGTGAGAGGGCTAAGCAGGCTCTCGCTTTT  
GAGCGGACTGATTTTCGACCAGGTCAGATCCCTGATGGAGAACAGCGATCGGTGCCAGGAC  
ATCAGGAACCTCGCATTTTCTGGGAATTGCATATAACACACTTCTGCGCATAGCTGAGATCG  
CCCGGATCAGAGTGAAAGACATCAGTCGAACGGACGGCGGCCGGATGCTTATTCATATTG  
GACGCACAAAGACATTGGTCAGCACCGCTGGCGTTGAAAAGGCCTTGTCCCTGGGCGTAA  
CGAAGCTGGTGGAAAGATGGATCTCAGTGTCCGGCGTGGCTGACGACCCTAATAATTACT  
TGTTCTGTCGAGTGAGAAAAACGGAGTCGCCGCGCCCTCTGCCACCAGCCAATTGAGTA  
CACGGGCCCTTGAAGGGATCTTTGAGGCAACCCACCGACTCATATACGGAGCCAAGGATG  
ACAGTGGCCAGAGGTATCTCGCCTGGTCAGGTCATTCTGCTAGGGTGGGGGCCCGCACGA  
GACATGGCGCGGGCAGGAGTCTCCATACCAGAGATTATGCAAGCTGGAGGTTGGACAAAT  
GTGAACATCGTTATGAACTATATCCGCAATCTTGACTCTGAAACCGGGGCCATGGTGGAGAC  
TGCTCGAAGATGGTGAATACCATACGATGTTCCAGATTACGCTTGAGCGGCCGCTTTCGA  
GCAGACATGATAAGATACATTGATGAGTTTGGACAAACCACAACCTAGAATGCAGTGAAAA  
AATGCTTTATTTGTGAAATTTGTGATGCTATTGCTTTATTTGTAACCATTATAAGCTGCAATA  
ACAAGTTAAACAACAACAAATTGCATTCATTTTATGTTTCAGGTTTCAGGGGGAGATGTGGGA  
GTTTTTTTAAAGCAAGTAAAACCTCTACAAATGTGGTAAATCGAGAGCATGGCTACGTAGA

TAAGTAGCATGGCGGGTTAATCATTAACACTACAAGGAACCCCTAGTGATGGAGTTGGCCACT  
CCCTCTCTGCGCGCTCGCTCGCTCACTGAGGCCGGGCGACCAAAGGTCGCCCGACGCCC  
GGGCTTTGCCCGGGCGGCCTCAGTGAGCGAGCGAGCGCGCAGCTGCATTAATGAATCGG  
CCAACGCGCGGGGAGAGGGCGTTTGGCGTATTGGGCGCTCTTCCGCTTCCCTCGCTCACTGA  
CTCGCTGCGCTCGGTCGTTCCGCTGCGGCGAGCGGTATCAGCTCACTCAAAGGCGGTAAT  
ACGGTTATCCACAGAATCAGGGGATAACGCAGGAAAGAACATGTGAGCAAACCGCAGCA  
AAAGGCCAGGAACCGTAAAAAGGCCGCGTTGCTGGCGTTTTTCCATAGGCTCCGCCCCCC  
TGACGAGCATCACAAAAATCGACGCTCAAGTCAGAGGTGGCGAAACCCGACAGGACTATA  
AAGATACCAGGCGTTTTCCCCCTGGAAGCTCCCTCGTGCGCTCTCCTGTTCCGACCCTGCC  
GCTTACCGGATACCTGTCCGCCTTTCTCCCTTCGGGAAGCGTGGCGCTTTCTCATAGCTCA  
CGCTGTAGGTATCTCAGTTCGGTGTAGGTGCTTCGCTCCAAGCTGGGCTGTGTGCACGAA  
CCCCCGTTTCAGCCCGACCGCTGCGCCTTATCCGGTAACTATCGTCTTGAGTCCAACCCG  
GTAAGACACGACTTATCGCCACTGGCAGCAGCCACTGGTAACAGGATTAGCAGAGCGAGG  
TATGTAGGCGGTGCTACAGAGTTCCTGAAGTGGTGGCCTAACTACGGCTACACTAGAAGG  
ACAGTATTTGGTATCTGCGCTCTGCTGAAGCCAGTTACCTTCGGAAAAAGAGTTGGTAGCT  
CTTGATCCGGCAAACAAACCACCGCTGGTAGCGGTGGTTTTTTTTGTTTGCAAGCAGCAGAT  
TACGCGCAGAAAAAAGGATCTCAAGAAGATCCTTTGATCTTTTCTACGGGGTCTGACGCT  
CAGTGGAACGAAAACACTCACGTTAAGGGATTTTGGTTCATGAGATTATCAAAAAGGATCTTCA  
CCTAGATCCTTTTAAATTAATAAATGAAGTTTTAAATCAATCTAAAGTATATATGAGTAACTT  
GGTCTGACAGTTACCAATGCTTAATCAGTGAGGCACCTATCTCAGCGATCTGTCTATTTTCGT  
TCATCCATAGTTGCCTGACTCCCCGTCGTGTAGATAACTACGATACGGGAGGGCTTACCAT  
CTGGCCCCAGTGCTGCAATGATACCGCGAGACCCACGCTCACCGGCTCCAGATTTATCAG  
CAATAAACCAGCCAGCCGGAAGGGCCGAGCGCAGAAGTGGTCTGCAACTTTATCCGCCT  
CCATCCAGTCTATTAATTGTTGCCGGGAAGCTAGAGTAAGTAGTTCGCCAGTTAATAGTTTTG  
CGCAACGTTGTTACCATTACTACAGGCATCGTGGTGTACGCTCGTCGTTTTGGTATGGCTT  
CATTACGCTCCGGTTCCCAACGATCAAGGCGAGTTACATGATCCCCCATGTTGTGCAAAAA  
AGCGGTTAGCTCCTTCGGTCCTCCGATCGTTGTCAGAAGTAAGTTGGCCGCAGTGTTATCA  
CTCATGGTTATGGCAGCACTGCATAATTCTCTTACTGTCATGCCATCCGTAAGATGCTTTTC  
TGTGACTGGTGTGACTCAACCAAGTCATTCTGAGAATAGTGTATGCGGCGACCGAGTTGC  
TCTTGCCCGGCGTCAATACGGGATAATACCGCGCCACATAGCAGAACTTTAAAAGTGCTCA  
TCATTGGAAAACGTTCTTCGGGGCGAAAACCTCAAGGATCTTACCACTATTGAGATCCAG  
TTCGATGTAACCCACTCGTGCACCCAACTGATCTTCAGCATCTTTTACTTTTACCAGCGTTT  
CTGGGTGAGCAAAAACAGGAAGGCCAAAATGCCGCAAAAAGGGAATAAGGGGCGACACGG  
AAATGTTGAATACTCATACTCTTCTTTTTCAATATTATTGAAGCATTTATCAGGGTTATTGT  
CTCATGAGCGGATACATATTTGAATGATTTTAGAAAAATAAACAAATAGGGGTTCCGCGCAC  
ATTTCCCCGAAAGATGCCACCTGAAATTATAAACGTTAATATTTTGTAAAATTCGCGTTAAA  
TTTTTGTAAATCAGCTCATTTTTTAACCAATAGGCCGAAATCGGAAAAATCCCTTATAAATC  
AAAAGAATAGACCGAGATAGGGTTGAGTGTGTTCCAGTTTGAACAAGAGTCCACTATTG  
AGGAACGTGAACTCCAGCGTCAAAGGGCGAAAACCGTCTATCGGGGCGATGGCCCACTA  
CGTGAACCATCACCTAATCAAGTTTTTTGGGGTTCGAGGTGCCGTAAAGCACTAAATCGGA  
ACCCTAAAGGGAGCCCCGATTTAGAGCTTGACGGGGAAAGCCGGCGAACGTGGCGAGA  
AAGGAAGGGAAGAAAGCGAAAGGAGCGGGCGCTAGGGCGCTGGCAAGTGTAGCGGTCAC  
GCTGCGCGTAACCAACACACCCGCCGCGCTTAATGCGCCGCTACAGGGCGCGTCCCATT  
CGCCATTCAGGCTGCGCAACTGTTGGGAAGGGCGATCGGTGCGGGCCTCTTCGCTATTAC  
GC
